# Supplementary material for: Calcitriol Suppresses Warburg Effect and Cell Growth in Human Colorectal Cancer Cells
Source: MDPI journal article supplement (doi:10.3390/life11090963), 2021-09-14
Supplement: s1 [file s1]

## Article

# Calcitriol Suppresses Warburg Effect and Cell Growth in Human Colorectal Cancer Cells

Chun-Yin Huang <sup>1</sup>, Yu-Ting Weng <sup>1,2,†</sup>, Po-Chen Li <sup>1,†</sup>, Nien-Tsu Hsieh <sup>1</sup>, Chun-I Li <sup>3</sup>, Hsiao-Sheng Liu <sup>3,4</sup> and Ming-Fen Lee <sup>1,2,\*</sup>

<sup>1</sup> Department of Nutrition, China Medical University, Taichung 406040, Taiwan; chuang@mail.cmu.edu.tw (C.-Y.H.); u106076201@cmu.edu.tw (Y.-T.W.); u107076003@cmu.edu.tw (P.-C.L.); u102059651@cmu.edu.tw (N.-T.H.); leemf@cmu.edu.tw (M.-F.L.)

<sup>2</sup> Department of Nutrition and Health Sciences, Chang Jung Christian University, Tainan 711301, Taiwan

<sup>3</sup> Department of Microbiology and Immunology, National Cheng Kung University, Tainan 70101, Taiwan; cili@glyconex.com.tw (C.-I.L.); hslu713@kmu.edu.tw (H.-S.L.)

<sup>4</sup> Center for Cancer Research, Graduate Institute of Clinical Medicine, College of Medicine, Kaohsiung Medical University, Kaohsiung 80708, Taiwan;

\* Correspondence: leemf@cmu.edu.tw; Tel.: +886-4-2205-3366 (ext. 7510)

† These authors contributed equally.

(A)

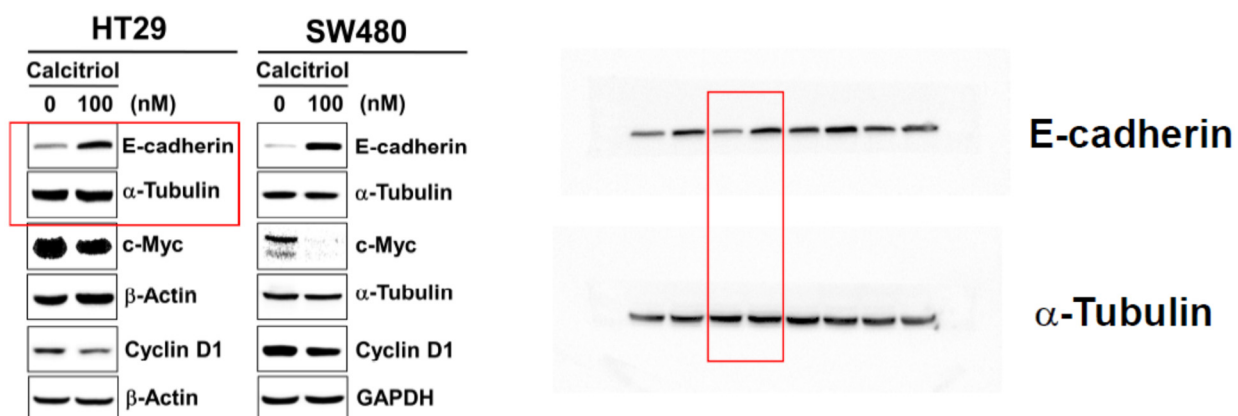

**(B)**

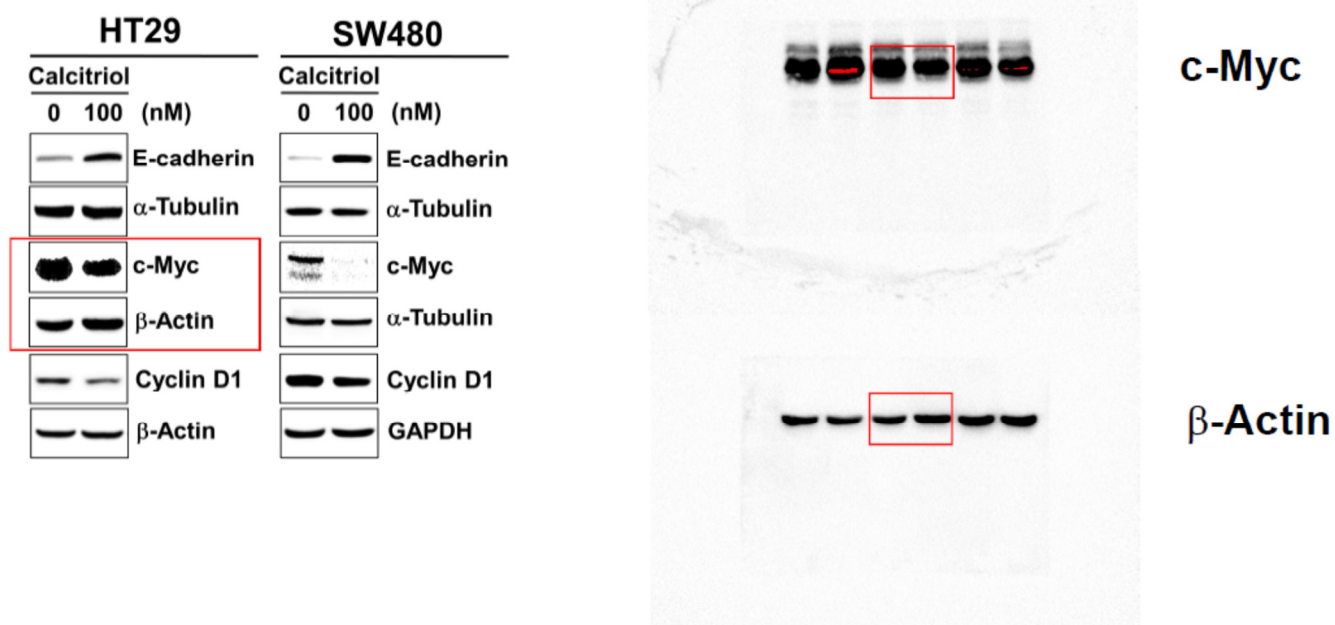

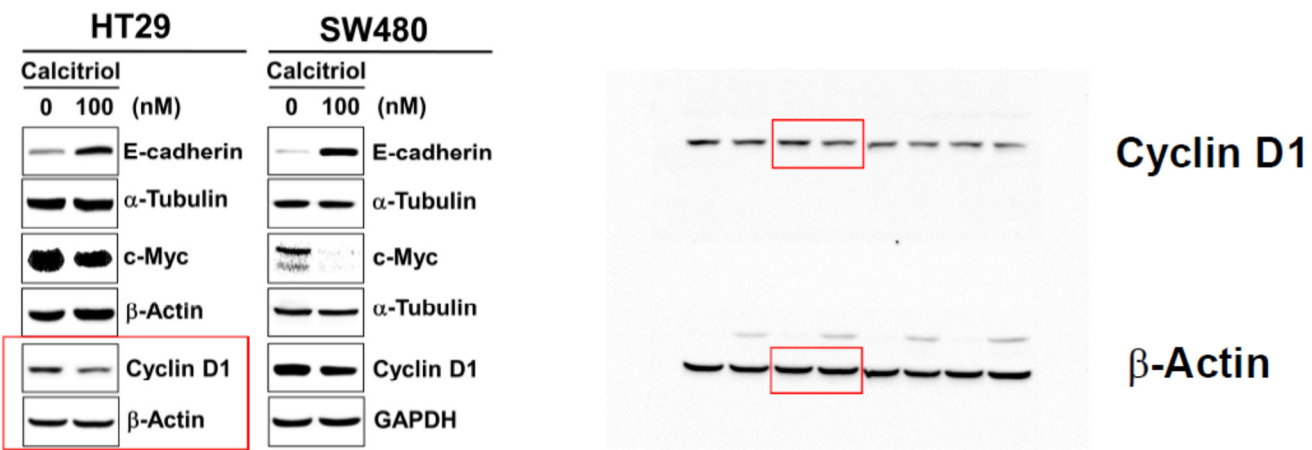

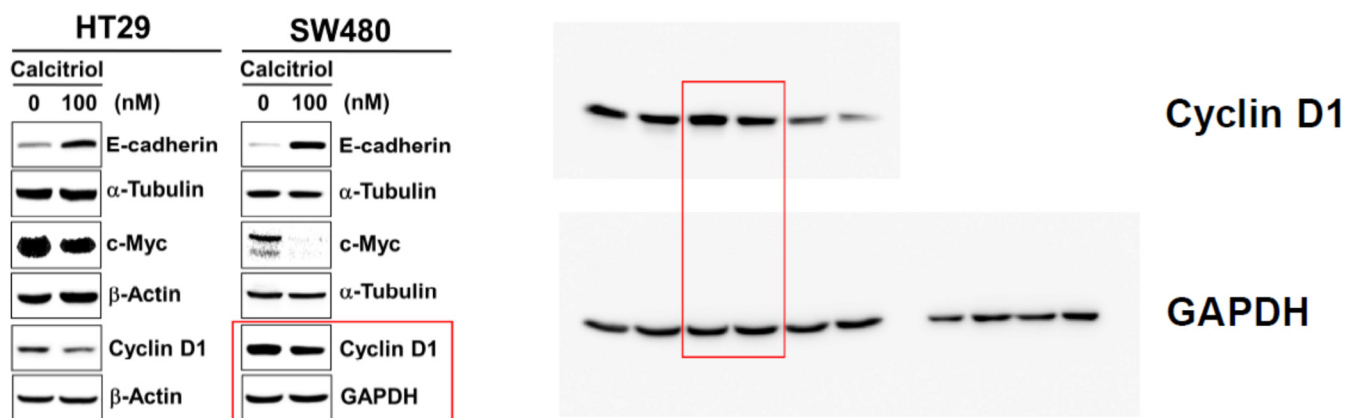

(F)

**Figure S1.** The original western blotting figures for Figure 1B Western blotting (A) HT29: E-cadherin,  $\alpha$ -Tubulin. (B) HT29: c-Myc,  $\beta$ -Actin. (C) HT29: Cyclin D1,  $\beta$ -Actin. (D) SW480: E-cadherin,  $\alpha$ -Tubulin. (E) SW480: c-Myc,  $\beta$ -Actin. (F) SW480: Cyclin D1, GAPDH.

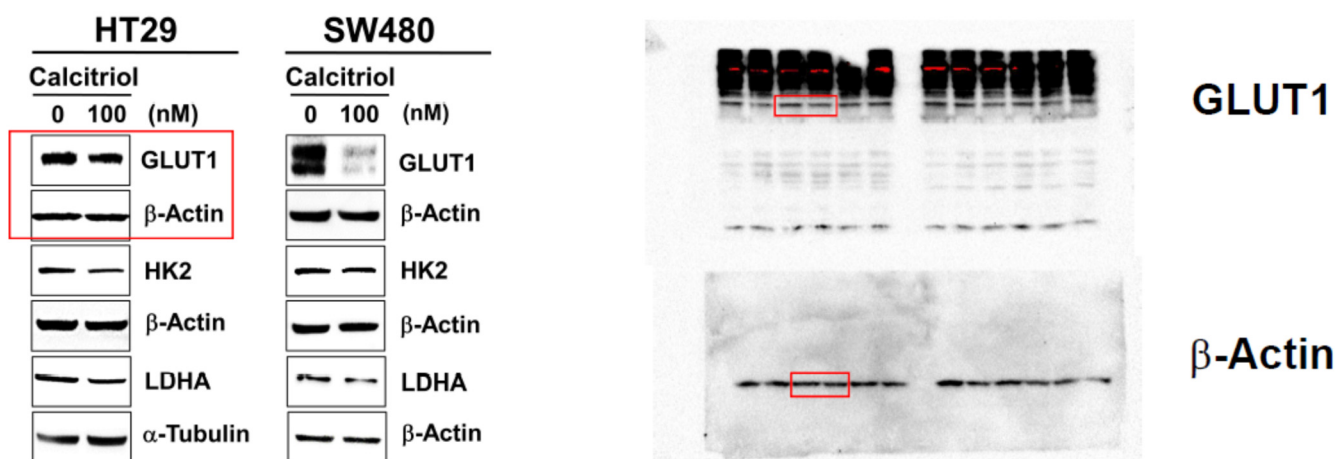

(A)

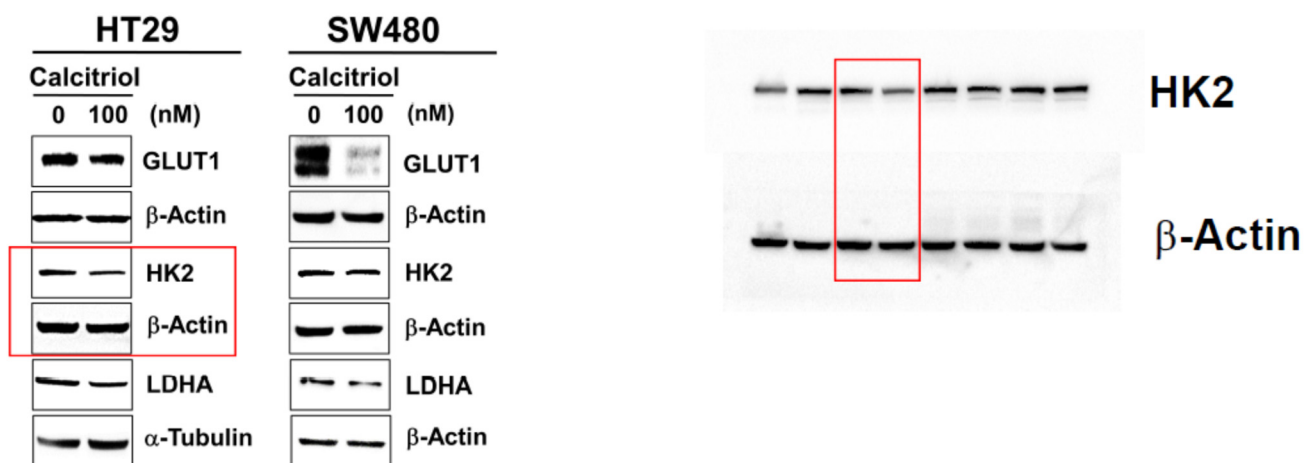

(B)

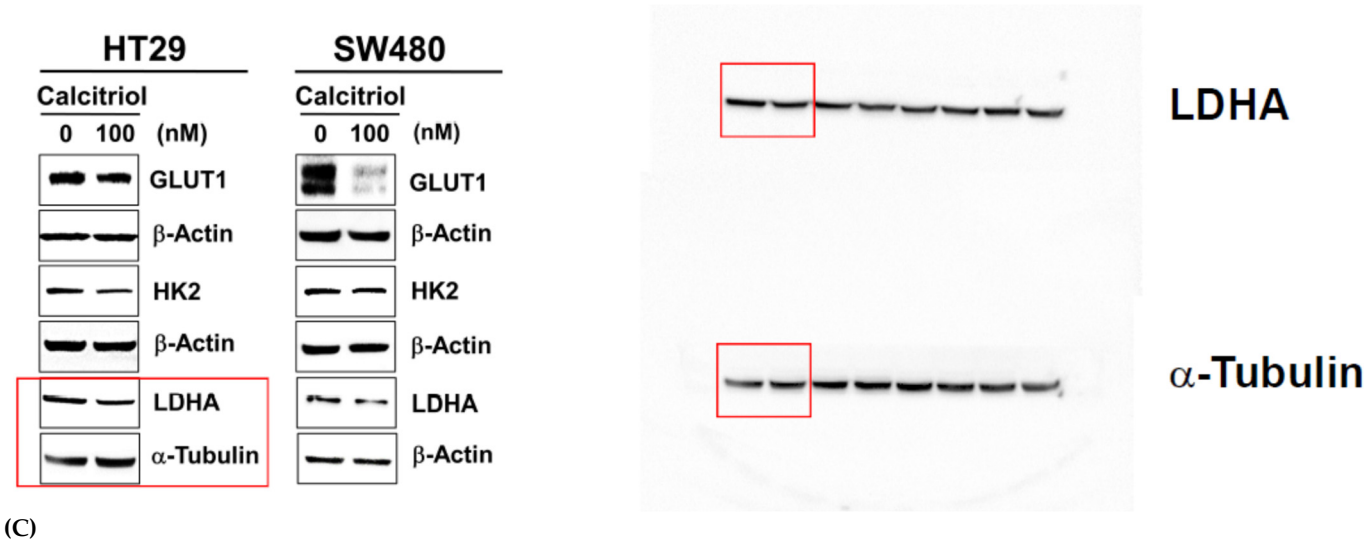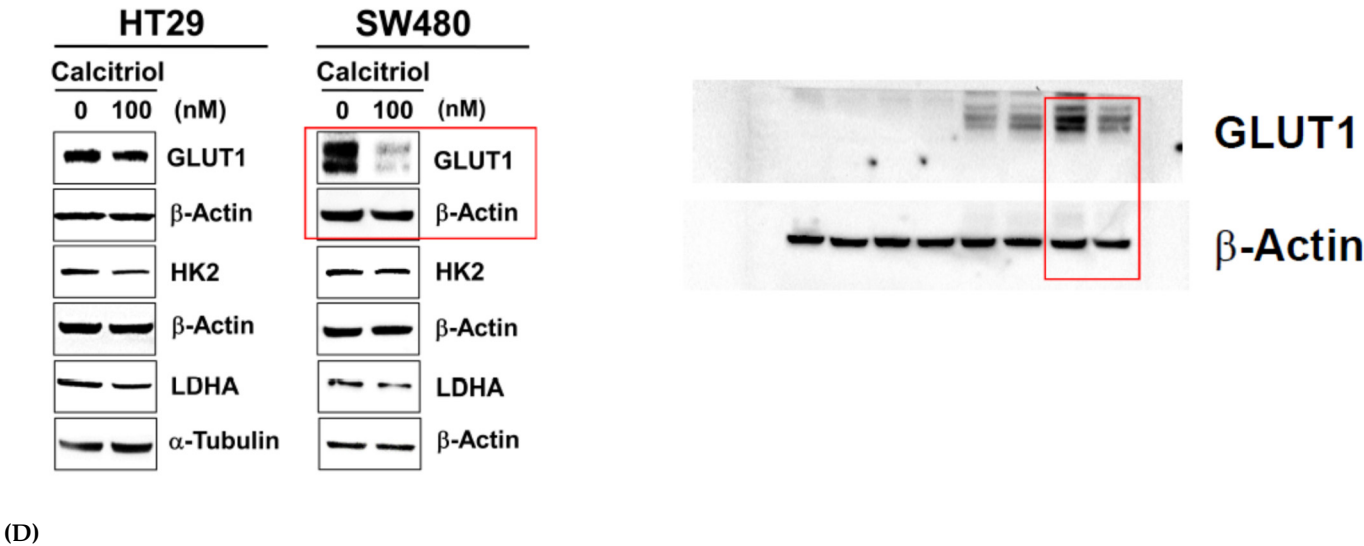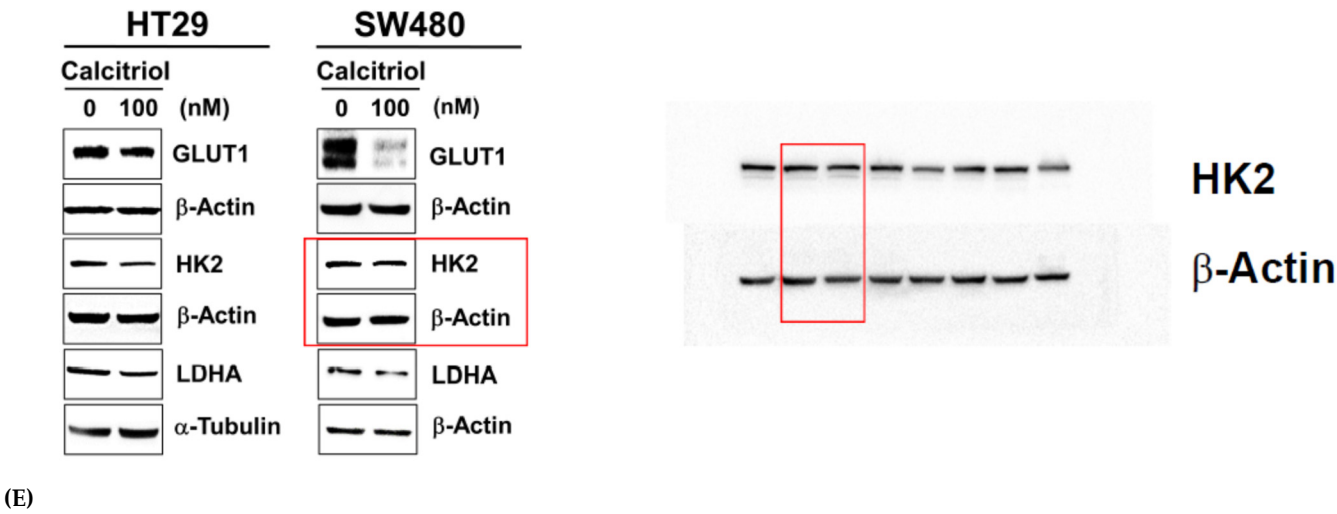

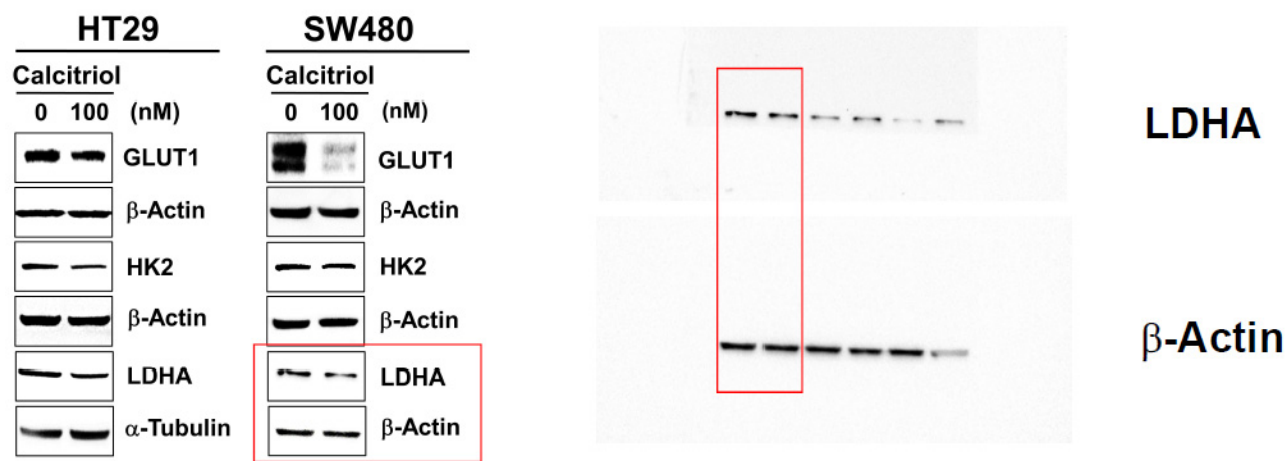

(F)

**Figure S2.** The original western blotting figures for Figure 2A Western blotting (A) HT29: GLUT1, β-Actin. (B) HT29: HK2, β-Actin. (C) HT29: LDHA, α-Tubulin. (D) SW480: GLUT1, β-Actin. (E) SW480: HK2, β-Actin. (F) SW480: LDHA, β-Actin.

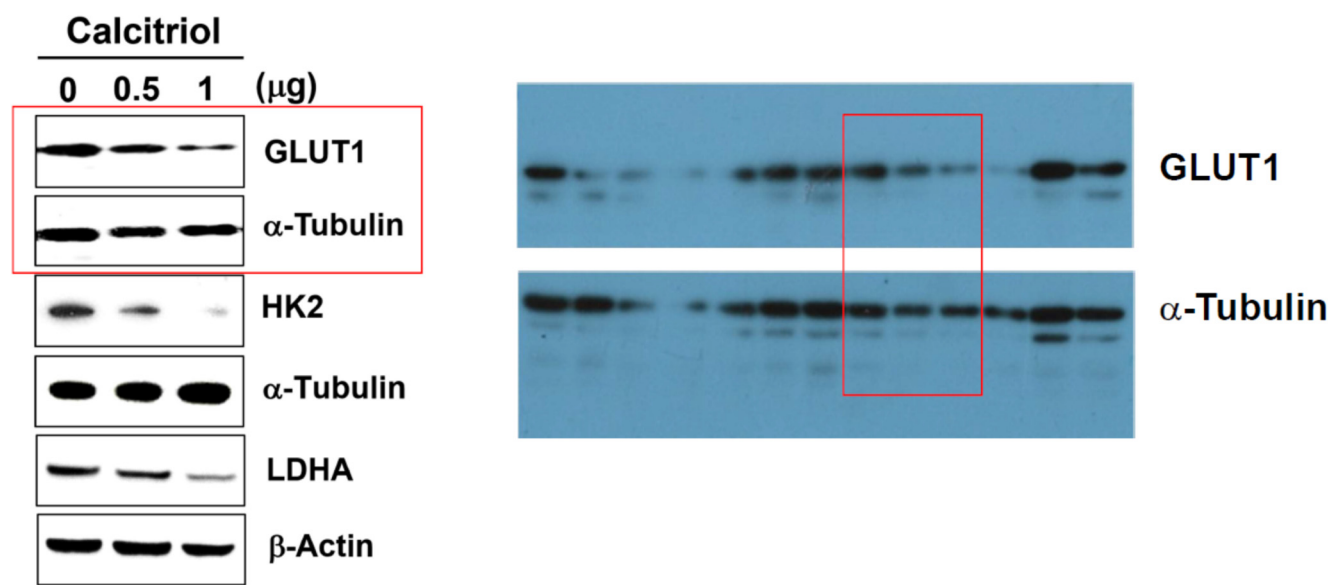

(A)

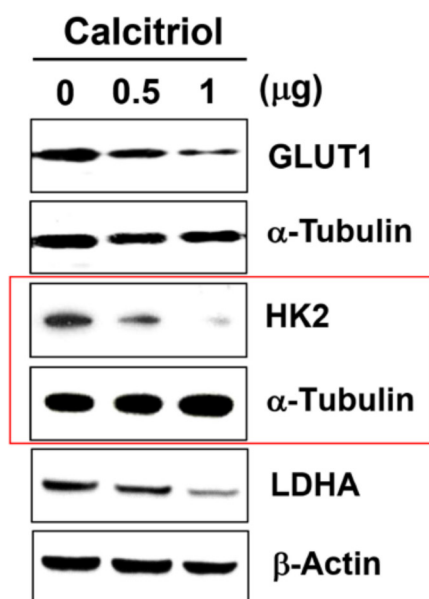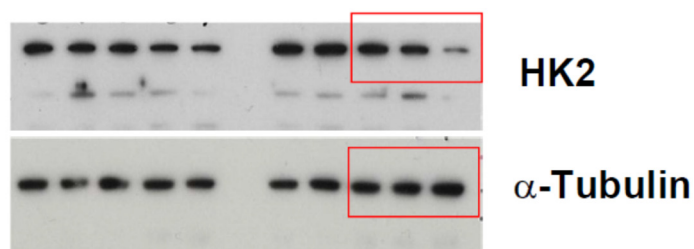

(B)

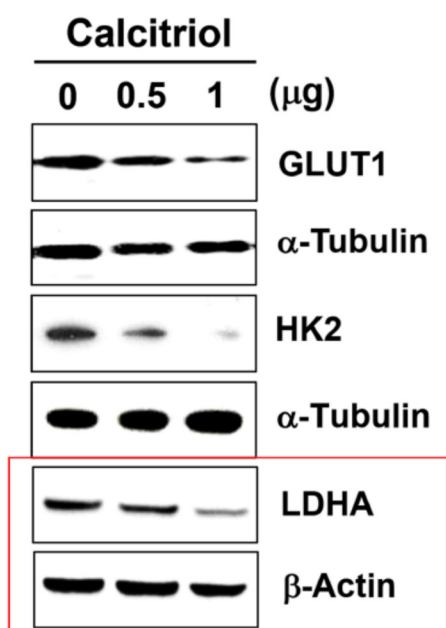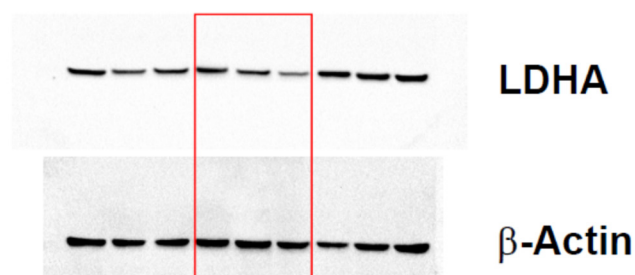

(C)

**Figure S3.** The original western blotting figures for Figure 3C Western blotting HT29 xenograft: (A) GLUT1,  $\alpha$ -Tubulin. (B) HK2,  $\alpha$ -Tubulin. (C) LDHA,  $\beta$ -Actin.
